# Supplementary material for: Epidemiological Changes in Leishmaniasis in Spain According to Hospitalization-Based Records, 1997–2011: Raising Awareness towards Leishmaniasis in Non-HIV Patients
Source: PLoS Negl Trop Dis. 2015 Mar 10;9(3):e0003594. doi: 10.1371/journal.pntd.0003594 (PMC4355586; doi:10.1371/journal.pntd.0003594)
Supplement: S1 Text — (XLSX) [file pntd.0003594.s001.xlsx]

## Sheet: Hoja1
Appendix 1. ICD-9 codes for underlying conditions and related factors for leishmaniasis disease, 1997-2011, Spain
Description	ICD-9-CM code(s)
Underlying conditions
Solid Neoplasm	40-199, 209
Lymphatic and hematopoietic neoplasms	200-208
Humoral immunity deficiency	279.00-09
Cell-mediated immune deficiency	279.10-13, 279.19
Combined immune deficiency	279.2
Unspecified immunodeficiency and other disorders involving the immune system	279.3, 279.8, 279.9
Autoimmunity disease	279.4
Aplastic anemia and other bone marrow failure syndromes	284
Transplant	v42.0-9
After transplant complications	996.8
Long-term steroid therapy	v58.65
Other related conditions
Diabetes Mellitus	250.0-9
Chronic alcoholism	303.90-93; 571.2-3
Hepatitis	v02.60-69
Long-term drugs use	v58.69
Homelessness and/or lack of economic and / or materials resources	v60.0-2
Institutionalized	v60.6
